# Supplementary material
Source: PubMed Central journal article supplement (PMC8381272)

# **Supplemental Material**

**The State of Renal Sympathetic Denervation for The Management of Patients with Hypertension: A Systematic Review & Meta-analysis**

Moinuddin Syed MD<sup>1\*</sup>, Mohammed Osman MD<sup>1\*</sup>, Hani Alhamoud MD<sup>1</sup>, Maryam Saleem MD<sup>1</sup>,  
Muhamad Bilal Munir MD<sup>1</sup>, Babikir Kheiri MD<sup>3</sup>, Sudarshan Balla MD<sup>1</sup>, Akram Kawsara MD<sup>1</sup>,  
Ramesh Daggubati MD<sup>1</sup>

<sup>1</sup> Division of Cardiology, West Virginia University School of Medicine, Morgantown, WV, USA

<sup>2</sup>Division of Cardiovascular Medicine, University of California San Diego, La Jolla, CA, USA

<sup>3</sup> Knight Cardiovascular Institute, Oregon Health & Science University, Portland, USA

\*Both Authors Contributed Equally

**Online Supplement**

|                                                                                                                                    |         |
|------------------------------------------------------------------------------------------------------------------------------------|---------|
| <b>eTable-1.</b> Checklist as per the Preferred Reporting System of Systematic Review and Meta-analysis (PRISMA) Guidelines        | Page 3  |
| <b>eTable-2.</b> Risk of bias assessments for included randomized clinical trials                                                  | Page 5  |
| <b>eFigure-1.</b> Risk of bias summary in the included trials in the meta-analysis                                                 | Page 6  |
| <b>eTable-3.</b> Baseline Characteristics of the studies included in the current meta-analysis                                     | Page 7  |
| <b>eFigure-2.</b> Forest plot with subgroup analysis of ON versus OFF groups for office systolic & diastolic blood pressure.       | Page 8  |
| <b>eFigure-3.</b> Forest plot reporting outcomes based on duration of follow-up for ambulatory systolic & diastolic blood pressure | Page 9  |
| <b>eFigure-4.</b> Forest plot reporting outcomes based on duration of follow-up for office systolic & diastolic blood pressure     | Page 10 |

**eTable-1.** Checklist as per the Preferred Reporting System of Systematic Review and Meta-analysis (PRISMA) Guidelines

| Section/topic                      | #  | Checklist item                                                                                                                                                                                                                                                                                              | Reported on page # |
|------------------------------------|----|-------------------------------------------------------------------------------------------------------------------------------------------------------------------------------------------------------------------------------------------------------------------------------------------------------------|--------------------|
| <b>TITLE</b>                       |    |                                                                                                                                                                                                                                                                                                             |                    |
| Title                              | 1  | Identify the report as a systematic review, meta-analysis, or both.                                                                                                                                                                                                                                         | 1                  |
| <b>ABSTRACT</b>                    |    |                                                                                                                                                                                                                                                                                                             |                    |
| Structured summary                 | 2  | Provide a structured summary including, as applicable: background; objectives; data sources; study eligibility criteria, participants, and interventions; study appraisal and synthesis methods; results; limitations; conclusions and implications of key findings; systematic review registration number. | 2                  |
| <b>INTRODUCTION</b>                |    |                                                                                                                                                                                                                                                                                                             |                    |
| Rationale                          | 3  | Describe the rationale for the review in the context of what is already known.                                                                                                                                                                                                                              | 3                  |
| Objectives                         | 4  | Provide an explicit statement of questions being addressed with reference to participants, interventions, comparisons, outcomes, and study design (PICOS).                                                                                                                                                  | 3                  |
| <b>METHODS</b>                     |    |                                                                                                                                                                                                                                                                                                             |                    |
| Protocol and registration          | 5  | Indicate if a review protocol exists, if and where it can be accessed (e.g., Web address), and, if available, provide registration information including registration number.                                                                                                                               | 4                  |
| Eligibility criteria               | 6  | Specify study characteristics (e.g., PICOS, length of follow-up) and report characteristics (e.g., years considered, language, publication status) used as criteria for eligibility, giving rationale.                                                                                                      | 4                  |
| Information sources                | 7  | Describe all information sources (e.g., databases with dates of coverage, contact with study authors to identify additional studies) in the search and date last searched.                                                                                                                                  | 4                  |
| Search                             | 8  | Present full electronic search strategy for at least one database, including any limits used, such that it could be repeated.                                                                                                                                                                               | 4                  |
| Study selection                    | 9  | State the process for selecting studies (i.e., screening, eligibility, included in systematic review, and, if applicable, included in the meta-analysis).                                                                                                                                                   | 4                  |
| Data collection process            | 10 | Describe method of data extraction from reports (e.g., piloted forms, independently, in duplicate) and any processes for obtaining and confirming data from investigators.                                                                                                                                  | 4                  |
| Data items                         | 11 | List and define all variables for which data were sought (e.g., PICOS, funding sources) and any assumptions and simplifications made.                                                                                                                                                                       | 4                  |
| Risk of bias in individual studies | 12 | Describe methods used for assessing risk of bias of individual studies (including specification of whether this was done at the study or outcome level), and how this information is to be used in any data synthesis.                                                                                      | 4                  |
| Summary measures                   | 13 | State the principal summary measures (e.g., risk ratio, difference in means).                                                                                                                                                                                                                               | 5                  |
| Synthesis of results               | 14 | Describe the methods of handling data and combining results of studies, if done, including measures of consistency (e.g., $I^2$ ) for each meta-analysis.                                                                                                                                                   | 5                  |

|                               |    |                                                                                                                                                                                                          |                                                     |
|-------------------------------|----|----------------------------------------------------------------------------------------------------------------------------------------------------------------------------------------------------------|-----------------------------------------------------|
| Risk of bias across studies   | 15 | Specify any assessment of risk of bias that may affect the cumulative evidence (e.g., publication bias, selective reporting within studies).                                                             | 5                                                   |
| Additional analyses           | 16 | Describe methods of additional analyses (e.g., sensitivity or subgroup analyses, meta-regression), if done, indicating which were pre-specified.                                                         | 5                                                   |
| <b>RESULTS</b>                |    |                                                                                                                                                                                                          |                                                     |
| Study selection               | 17 | Give numbers of studies screened, assessed for eligibility, and included in the review, with reasons for exclusions at each stage, ideally with a flow diagram.                                          | 6                                                   |
| Study characteristics         | 18 | For each study, present characteristics for which data were extracted (e.g., study size, PICOS, follow-up period) and provide the citations.                                                             | eTable-1                                            |
| Risk of bias within studies   | 19 | Present data on risk of bias of each study and, if available, any outcome level assessment (see item 12).                                                                                                | eFigure-1                                           |
| Results of individual studies | 20 | For all outcomes considered (benefits or harms), present, for each study: (a) simple summary data for each intervention group (b) effect estimates and confidence intervals, ideally with a forest plot. | All figures have outcomes as per individual studies |
| Synthesis of results          | 21 | Present results of each meta-analysis done, including confidence intervals and measures of consistency.                                                                                                  | 7-8                                                 |
| Risk of bias across studies   | 22 | Present results of any assessment of risk of bias across studies (see Item 15).                                                                                                                          | eFigure-1                                           |
| Additional analysis           | 23 | Give results of additional analyses, if done (e.g., sensitivity or subgroup analyses, meta-regression [see Item 16]).                                                                                    | 7-9                                                 |
| <b>DISCUSSION</b>             |    |                                                                                                                                                                                                          |                                                     |
| Summary of evidence           | 24 | Summarize the main findings including the strength of evidence for each main outcome; consider their relevance to key groups (e.g., healthcare providers, users, and policy makers).                     | 9                                                   |
| Limitations                   | 25 | Discuss limitations at study and outcome level (e.g., risk of bias), and at review-level (e.g., incomplete retrieval of identified research, reporting bias).                                            | 10                                                  |
| Conclusions                   | 26 | Provide a general interpretation of the results in the context of other evidence, and implications for future research.                                                                                  | 9-10                                                |
| <b>FUNDING</b>                |    |                                                                                                                                                                                                          |                                                     |
| Funding                       | 27 | Describe sources of funding for the systematic review and other support (e.g., supply of data); role of funders for the systematic review.                                                               | 1                                                   |

**eTable-2.** Risk of bias assessments for included randomized clinical trials

|    | Trial Name                 | Random sequence generation (selection bias) | Allocation concealment (selection bias) | Blinding of Researchers | Blinding of outcome assessment (detection bias) | Incomplete outcome data (attrition bias) | Selective reporting (reporting bias) | Other bias |
|----|----------------------------|---------------------------------------------|-----------------------------------------|-------------------------|-------------------------------------------------|------------------------------------------|--------------------------------------|------------|
| 1. | Desch et al                | Low                                         | Low                                     | Low                     | Low                                             | Low                                      | Low                                  | Unclear    |
| 2. | SYMPPLICITY HTN-3          | Low                                         | Low                                     | Low                     | Low                                             | Low                                      | Low                                  | Unclear    |
| 3. | ReSET                      | Low                                         | Low                                     | Low                     | Low                                             | Low                                      | Low                                  | Unclear    |
| 4. | REINFORCE                  | Low                                         | Low                                     | Low                     | Low                                             | High                                     | Low                                  | Unclear    |
| 5. | SPYRAL HTN-OFF MED Pivotal | Low                                         | Low                                     | Low                     | Low                                             | Low                                      | Low                                  | High       |
| 6. | SPYRAL HTN-OFF MED         | Low                                         | Low                                     | Low                     | Low                                             | Low                                      | Low                                  | High       |
| 7. | RADIANCE-HTN SOLO          | Low                                         | Low                                     | Low                     | Low                                             | Low                                      | Low                                  | Unclear    |
| 8. | SPYRAL HTN-ON MED          | Low                                         | Low                                     | Low                     | Low                                             | Low                                      | Low                                  | High       |

**eFigure-1.** Risk of bias summary in the included trials in the meta-analysis

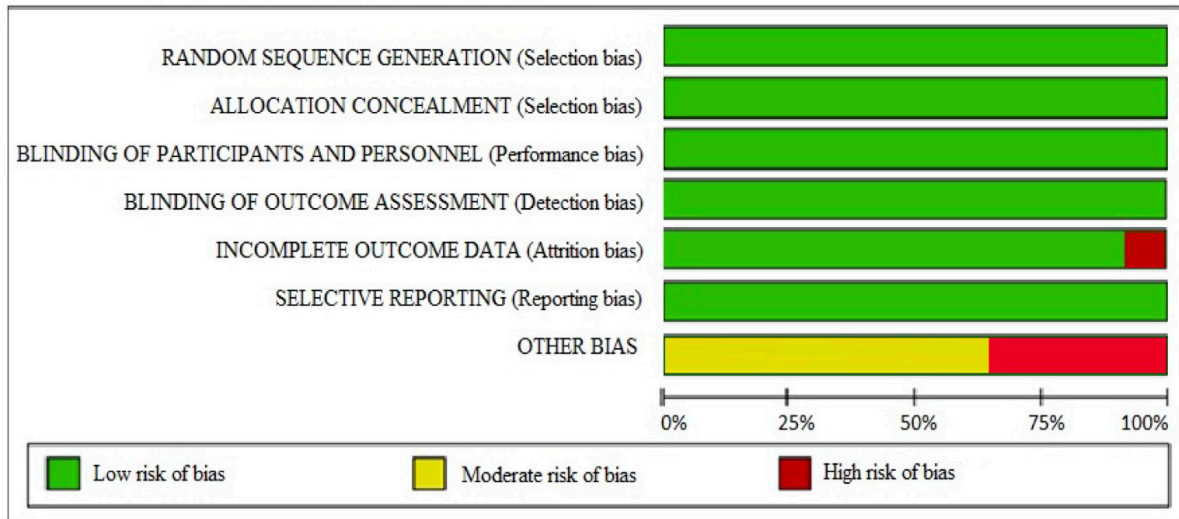

**eTable-3.** Baseline Characteristics of the studies included in the current meta-analysis

| Study                             | Total Patients (RSD/Sham) | Follow-Up Duration (Months) | Denervation Method                                                                                                                                                                                     | Enrollment Period                   | Participating Centers                                                                              |
|-----------------------------------|---------------------------|-----------------------------|--------------------------------------------------------------------------------------------------------------------------------------------------------------------------------------------------------|-------------------------------------|----------------------------------------------------------------------------------------------------|
| <b>Desch et al</b>                | 35/36                     | 6                           | Radiofrequency ablation with Symplicity Flex Catheter (Medtronic, Santa Rosa, California)                                                                                                              | July 2012 to January 2014           | Single-center, Leipzig, Germany                                                                    |
| <b>SYMPPLICITY HTN-3</b>          | 364/171                   | 6                           | Radiofrequency energy delivered by the Symplicity renal-denervation catheter (Medtronic)                                                                                                               | October 2011 to May 2013            | 88 sites in the United States                                                                      |
| <b>ReSet</b>                      | 36/33                     | 6                           | Radiofrequency ablation with unipolar Medtronic Flex catheter (Medtronic)                                                                                                                              | NR                                  | Single-center, Skejby, Denmark                                                                     |
| <b>REINFORCE Trial</b>            | 34/17                     | 12                          | radiofrequency renal denervation with Vessix Renal Denervation                                                                                                                                         | April 2015 to October 2017          | Multiple centers I the usinted states                                                              |
| <b>SPYRAL HTN-OFF MED Pivotal</b> | 166/165                   | 3                           | Radiofrequency ablation with Symplicity Spyral multielectrode renal denervation catheter (Medtronic; Galway, Ireland) and the Symplicity G3 radiofrequency generator (Medtronic; Minneapolis, MN, USA) | June 25, 2015, to Oct 15, 2019      | 44 study sites in Australia, Austria, Canada, Germany, Greece, Ireland, Japan, the UK, and the USA |
| <b>SPYRAL HTN- OFF MED</b>        | 38/42                     | 3                           | Radiofrequency ablation with Symplicity Spyral multielectrode catheter (Medtronic, Galway, Ireland) and the Symplicity G3 (Medtronic) generator                                                        | June 25, 2015 to January 30, 2017   | 21 centers in the United States, Europe, Japan, and Australia                                      |
| <b>RADIANCE-HTN SOLO</b>          | 74/72                     | 6                           | Endovascular ultrasound renal denervation with Paradise endovascular ultrasound renal denervation system ultrasound renal denervation system                                                           | March 28, 2016 to December 28, 2017 | 21 hospitals in the United States and 18 in Europe                                                 |
| <b>SPYRAL HTN- ON MED</b>         | 38/42                     | 6                           | Radiofrequency ablation with Symplicity Spyral multielectrode catheter (Medtronic)                                                                                                                     | July 22, 2015 to June 14, 2017      | 25 centers in the United States, Germany, Japan, United Kingdom, Australia, Austria, and Greece    |





**eFigure-3.** Forest plot comparing the outcomes of Renal Sympathetic Denervation (RSD) versus sham. (A) Ambulatory systolic blood pressure in studies reporting outcomes at > 3 month of follow up and studies reporting ≤ 3month of follow-up. (B) Ambulatory diastolic blood pressure in studies reporting outcomes at > 3 month of follow up and studies reporting ≤ 3month of follow-up.

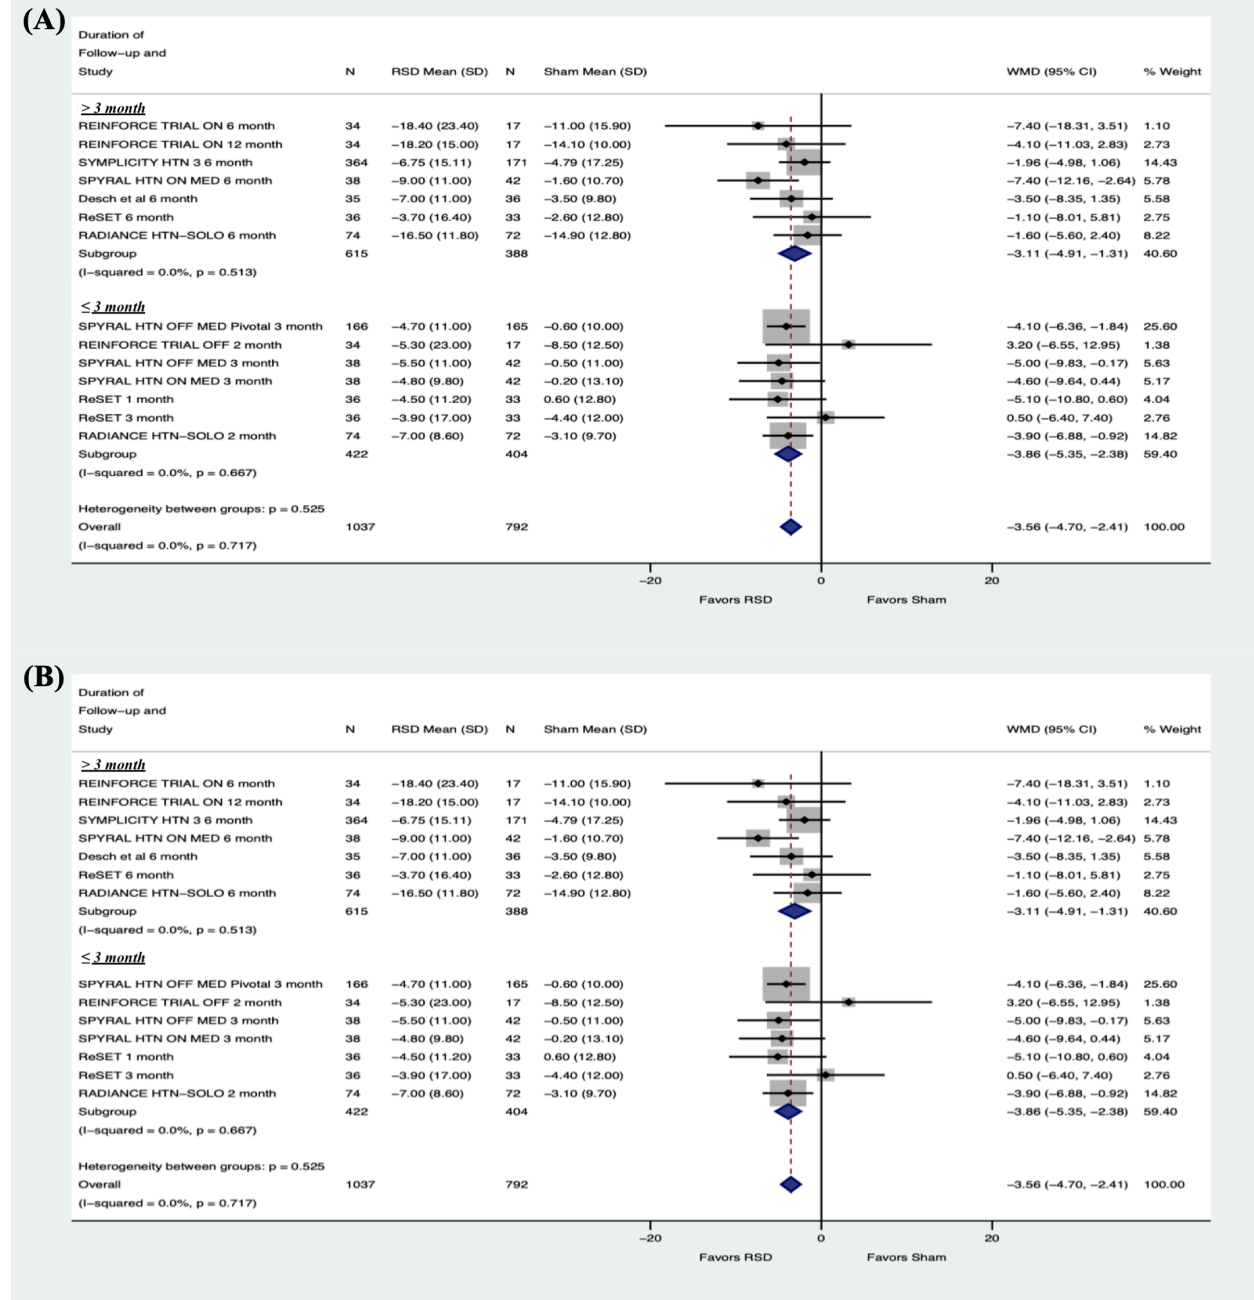

Supplement: NIHMS1732167-supplement-Supplemental_Information.pdf [file NIHMS1732167-supplement-Supplemental_Information.pdf]
